# Supplementary material for: Deep sequencing and pathway-focused analysis revealed multigene oncodriver signatures predicting survival outcomes in advanced colorectal cancer
Source: PubMed Central journal article supplement (PMC6054833; doi:10.1038/s41389-018-0066-2), 2018-07-22
Supplement: 41389_2018_66_MOESM1_ESM.pdf [file 41389_2018_66_MOESM1_ESM.pdf]

Supplementary Figure 1: MutationMapper illustrating the detected mutations (and their nature) represented on the linear proteins.

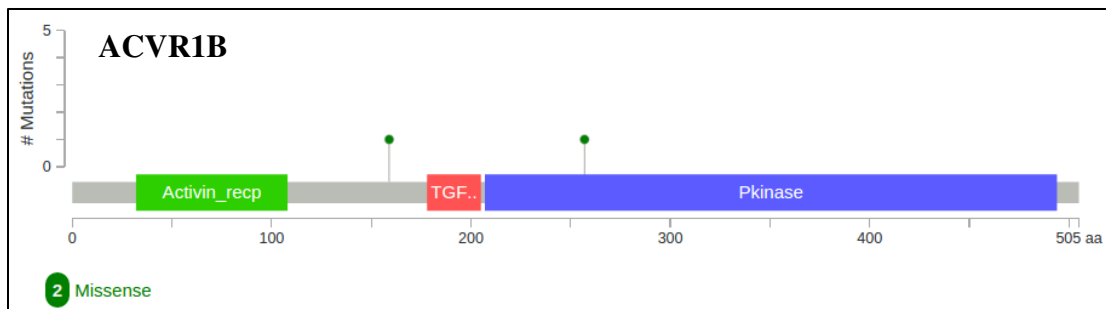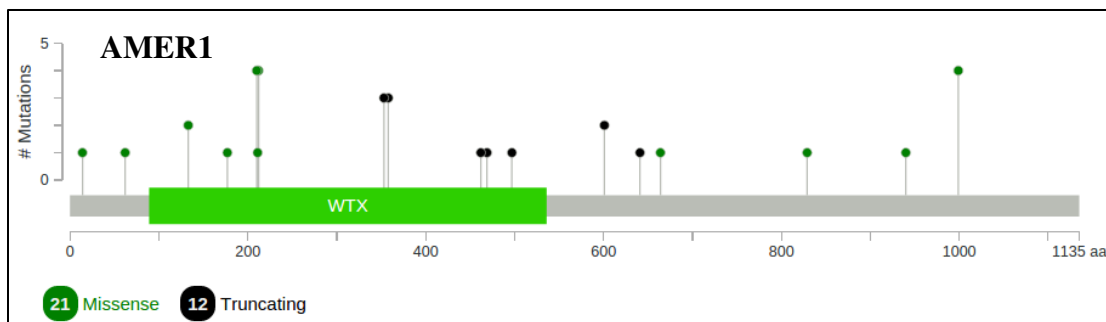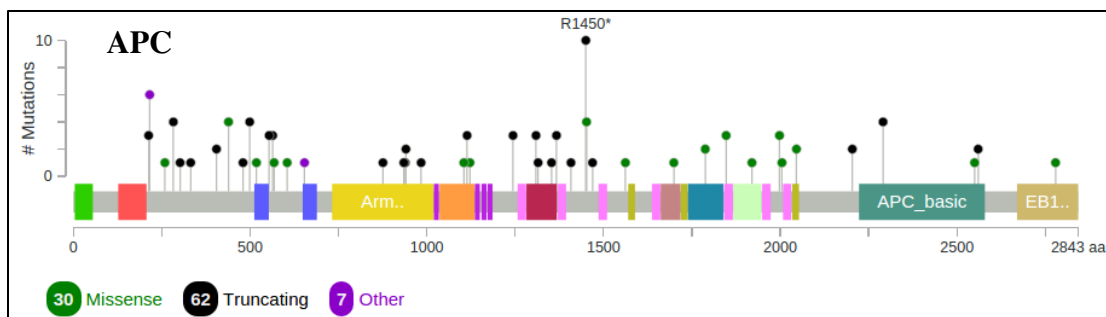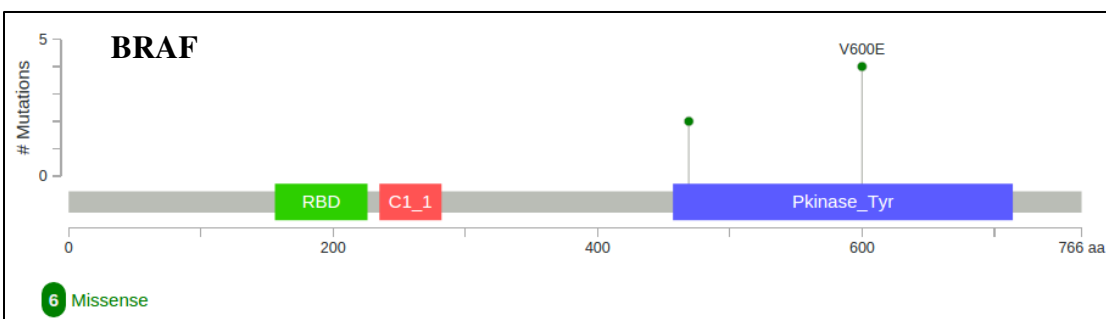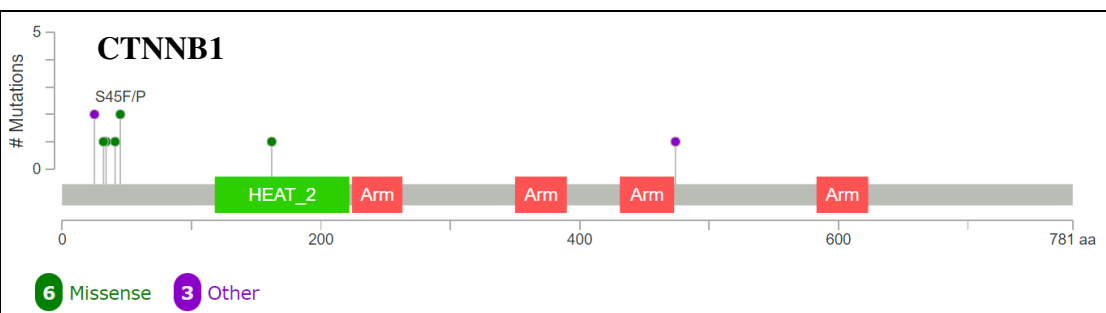

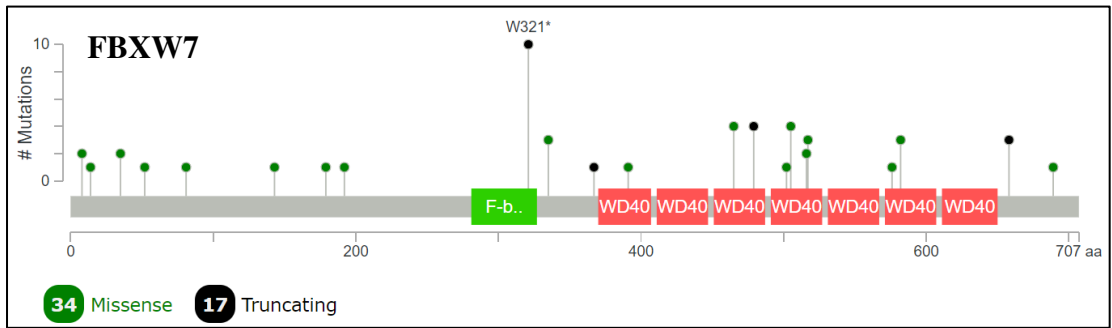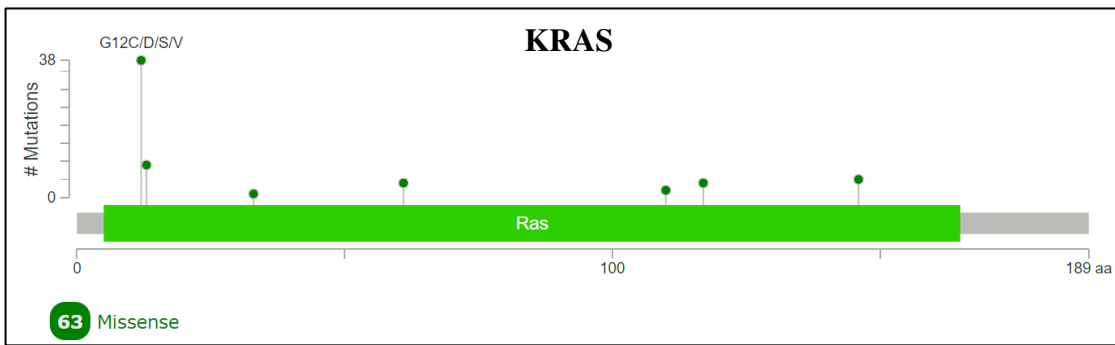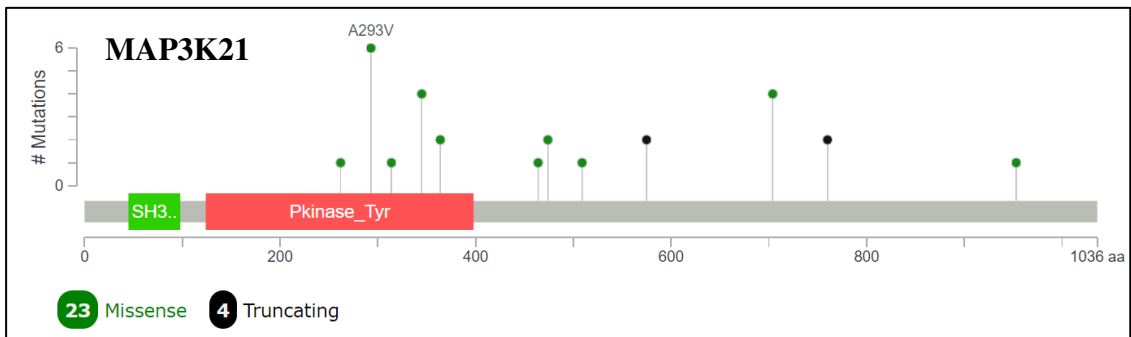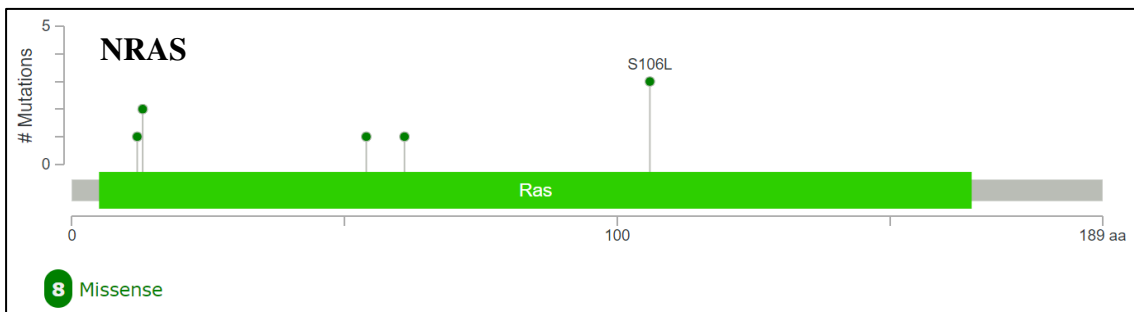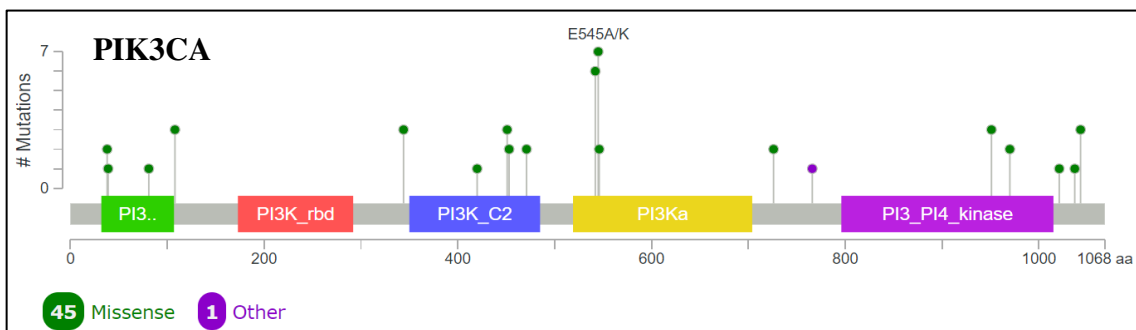

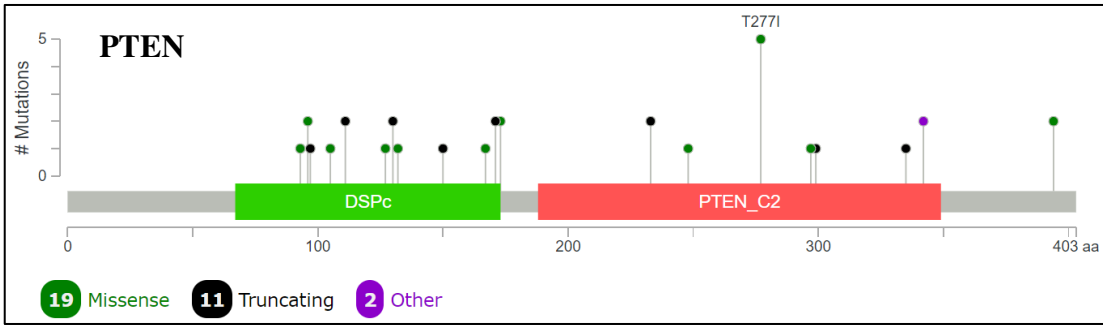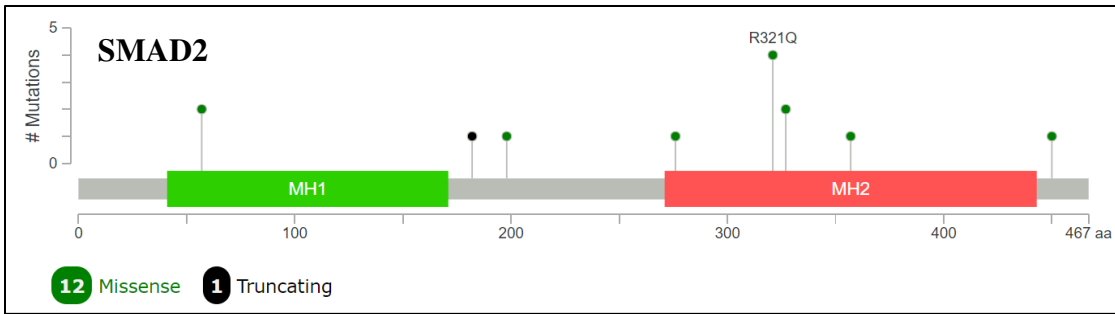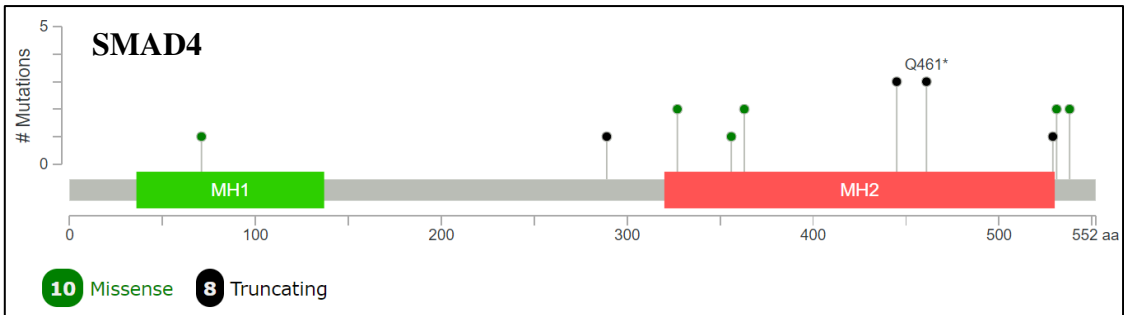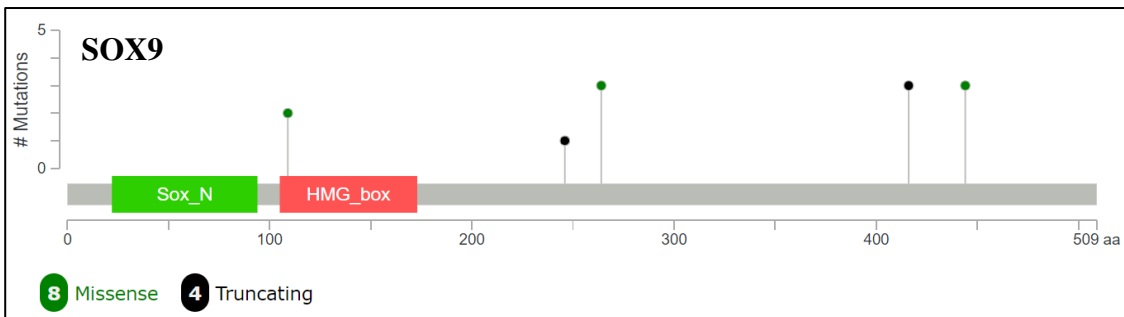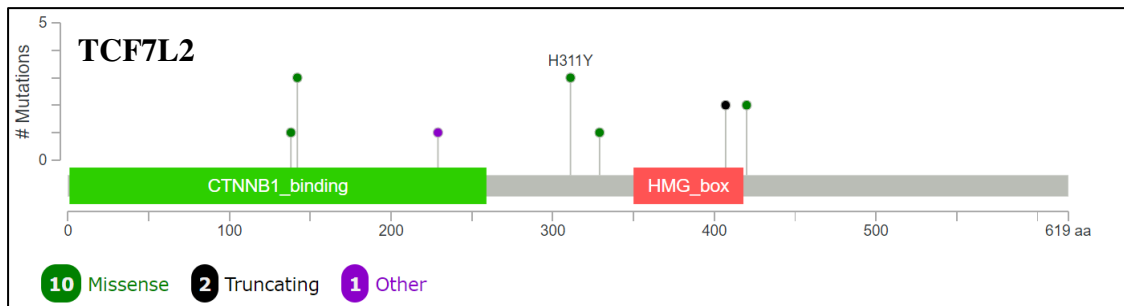

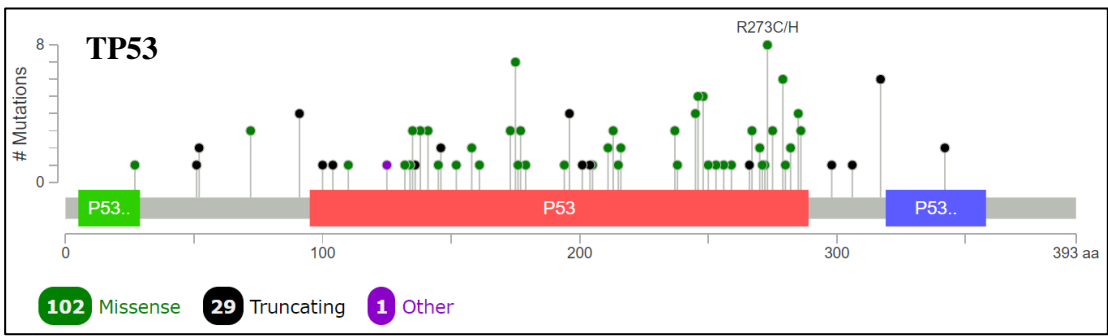

Supplementary Figure 2: Kaplan-Meier survival curves of overall survival (ODS1 panel A and B; ODS2 panel C and D).

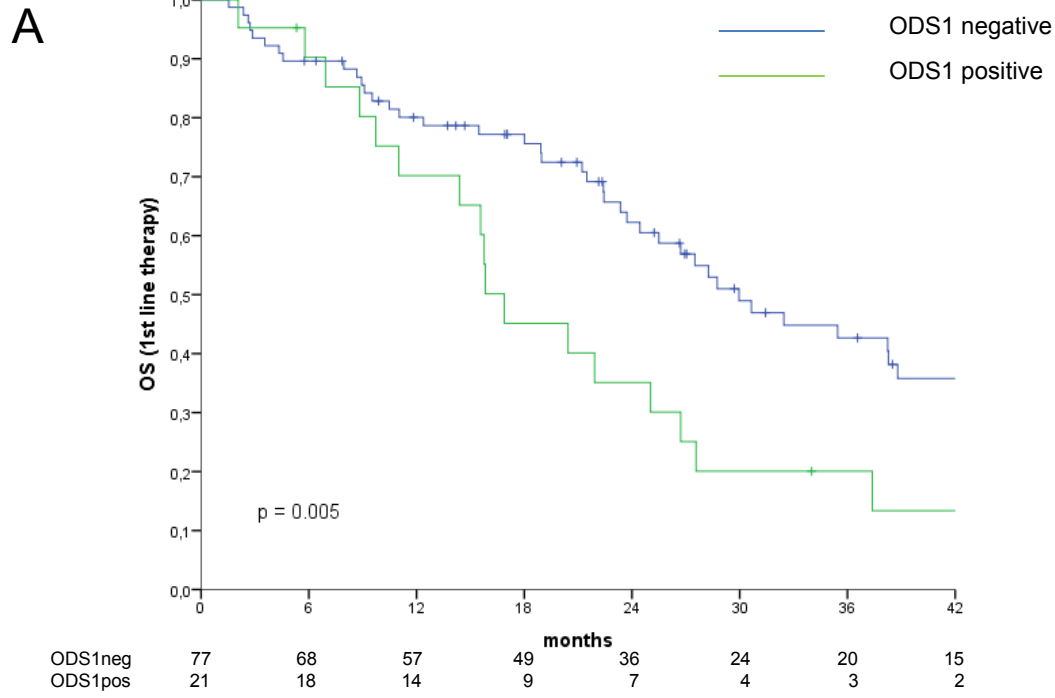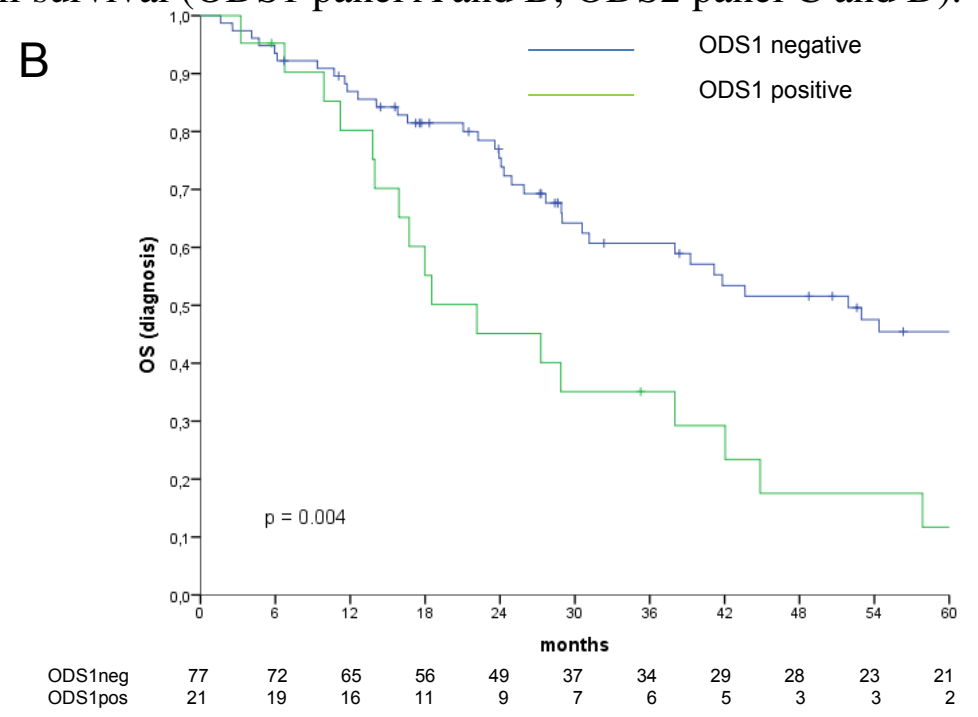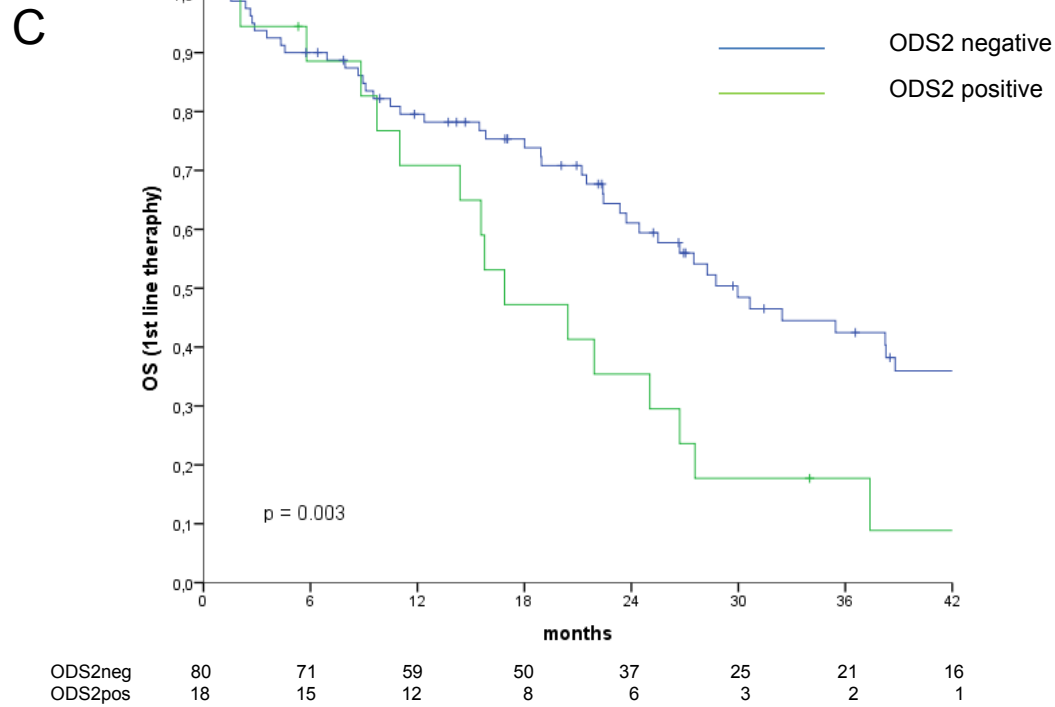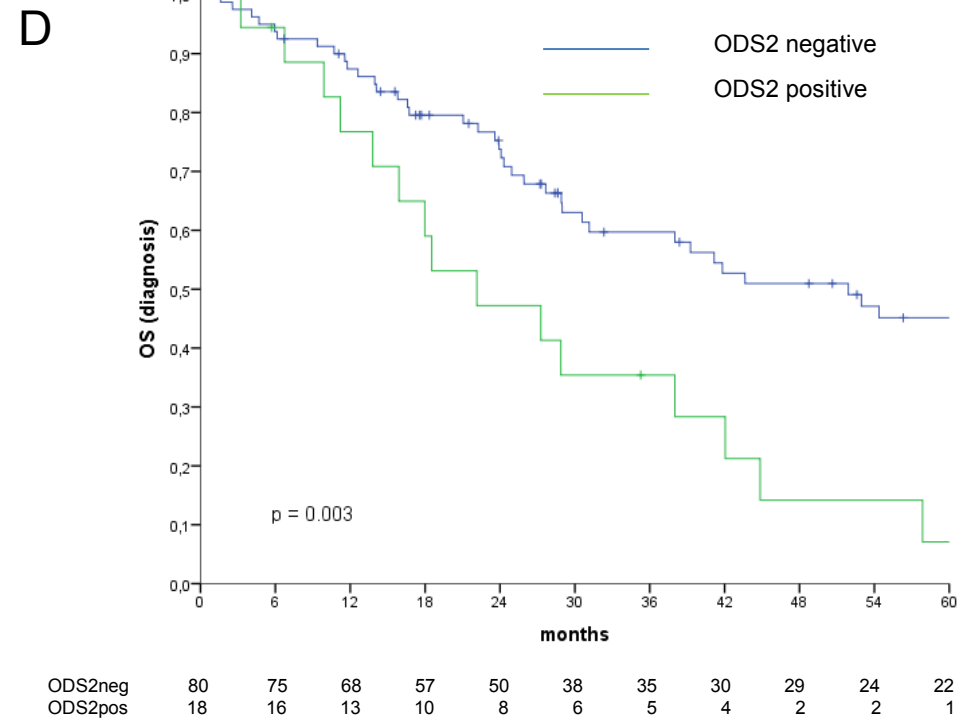

**Supplementary Table 1:** Mutation frequencies related to 16 CRC-associated genes observed in the present study (IRE-IFO) and in four publically available datasets (TCGA, DFCI, MSKCC, Genentech).

| <b>GENE (PATHWAY)</b>  | <b>IRE-IFO<br/>(N=98)</b> | <b>TCGA<br/>(N=224)</b> | <b>DFCI<br/>(N=619)</b> | <b>MSKCC<br/>(N=69)</b> | <b>GENENTECH<br/>(N=72)</b> |
|------------------------|---------------------------|-------------------------|-------------------------|-------------------------|-----------------------------|
| ACVR1B (TGF- $\beta$ ) | <b>1%</b>                 | 6%                      | 5%                      | 0%                      | 1.5%                        |
| AMER1 (WNT)            | <b>7%</b>                 | 11%                     | 8%                      | 9%                      | 6%                          |
| APC (WNT)              | <b>53%</b>                | 75%                     | 57%                     | 91%                     | 40%                         |
| BRAF (RAS-MAPK)        | <b>6%</b>                 | 9%                      | 20%                     | 4%                      | 8%                          |
| CTNNB1 (WNT)           | <b>5%</b>                 | 5%                      | 6%                      | 7%                      | 7%                          |
| FBXW7 (WNT)            | <b>21%</b>                | 17%                     | 13%                     | 9%                      | 21%                         |
| KRAS (RAS-MAPK)        | <b>58%</b>                | 42%                     | 28%                     | 55%                     | 51%                         |
| MAP3K21 (RAS-MAPK)     | <b>17%</b>                | 7%                      | 4%                      | 0%                      | 0%                          |
| NRAS (RAS-MAPK)        | <b>8%</b>                 | 9%                      | 4%                      | 3%                      | 3%                          |
| PIK3CA (PI3K-PTEN)     | <b>33%</b>                | 20%                     | 21%                     | 22%                     | 31%                         |
| PTEN (PI3K-PTEN)       | <b>20%</b>                | 4%                      | 8%                      | 3%                      | 6%                          |
| SMAD2 (TGF- $\beta$ )  | <b>8%</b>                 | 7%                      | 5%                      | 0%                      | 8%                          |
| SMAD4 (TGF- $\beta$ )  | <b>12%</b>                | 12%                     | 11%                     | 14%                     | 24%                         |
| SOX9 (WNT)             | <b>11%</b>                | 4%                      | 10%                     | 0%                      | 3%                          |
| TCF7L2 (WNT)           | <b>8%</b>                 | 12%                     | 7%                      | 0%                      | 8%                          |
| TP53 (p53 network)     | <b>65%</b>                | 54%                     | 50%                     | 83%                     | 56%                         |

**Supplementary Table 2:** Statistically significant associations between the mutational status of 16 CRC-related genes and basal clinical features (N=98).

|                            | Stage at diagnosis |                               | Chi2 Test<br>p-value |
|----------------------------|--------------------|-------------------------------|----------------------|
|                            | II-III<br>N(%)     | IV<br>N(%)                    |                      |
| <b>AMERwt</b>              | 29 (31.9)          | 62 (68.1)                     | 0.047*               |
| <b>AMERmut</b>             | 5 (71.4)           | 2 (28.6)                      |                      |
| <b>PTENwt</b>              | 23 (29.5)          | 55 (70.5)                     | 0.032                |
| <b>PTENmut</b>             | 11 (55.0)          | 9 (45.0)                      |                      |
| ECOG PS                    |                    |                               |                      |
|                            | 0<br>N(%)          | 1-2<br>N(%)                   |                      |
| <b>CTNNB1wt</b>            | 42 (45.2)          | 51 (54.8)                     | 0.023*               |
| <b>CTNNB1mut</b>           | 5 (100.0)          | 0 (0.0)                       |                      |
| <b>TP53wt</b>              | 11 (32.4)          | 23 (67.6)                     | 0.024                |
| <b>TP53mut</b>             | 36 (56.3)          | 28 (43.8)                     |                      |
| Number of Metastatic Sites |                    |                               |                      |
|                            | 1<br>N(%)          | ≥2<br>N(%)                    |                      |
| <b>FBXW7wt</b>             | 36 (46.8)          | 41 (53.2)                     | 0.017                |
| <b>FBXW7mut</b>            | 16 (76.2)          | 5 (23.8)                      |                      |
| Side                       |                    |                               |                      |
|                            | Left<br>N(%)       | Right +<br>Transverse<br>N(%) |                      |
| <b>KRASwt</b>              | 28 (68.3)          | 13 (31.7)                     | 0.039                |
| <b>KRASmut</b>             | 27 (47.4)          | 30 (52.6)                     |                      |
| <b>TP53wt</b>              | 14 (41.2)          | 20 (58.8)                     | 0.030                |
| <b>TP53mut</b>             | 41 (64.1)          | 23 (35.9)                     |                      |

\* Fisher's Exact Test

**Supplementary Table 3:** Mutational status of the genes included in the OncoDriver signature 1 and 2 (ODS1 and ODS2).

| GENE<br>SIGNATURE | TP53 | APC | AMER1 | TCF7L2 | FBXW7 | SOX9            | CTNNB1          |
|-------------------|------|-----|-------|--------|-------|-----------------|-----------------|
| ODS1              | MUT  | MUT | WT    | WT     | WT    | Not<br>Included | Not<br>Included |
| ODS2              | MUT  | MUT | WT    | WT     | WT    | WT              | WT              |



**Supplementary Table 4:** Univariate and multivariate Cox regression models for progression-free survival (N=98). The multivariate Cox models were obtained by adjusting for all the variables tested in univariate analysis.

|                                             |                       | Univariate Cox regression model |         | Multivariate Cox regression model (ODS1 pos vs neg) |         | Multivariate Cox regression model (ODS2 pos vs neg) |         |
|---------------------------------------------|-----------------------|---------------------------------|---------|-----------------------------------------------------|---------|-----------------------------------------------------|---------|
|                                             |                       | HR (95%CI)                      | p-value | HR (95%CI)                                          | p-value | HR (95%CI)                                          | p-value |
| <b>ODS1</b>                                 | <b>Pos vs Neg</b>     | 2.42 (1.44-4.06)                | 0.001   | 2.16 (1.26-3.70)                                    | 0.005   |                                                     |         |
| <b>ODS2</b>                                 | <b>Pos vs Neg</b>     | 2.76 (1.59-4.80)                | <0.001  |                                                     |         | 2.56 (1.45-4.51)                                    | 0.001   |
| <b>Gender</b>                               | <b>Female vs Male</b> | 0.79 (0.51-1.24)                | 0.315   | 0.84 (0.53-1.35)                                    | 0.478   | 0.82 (0.51-1.30)                                    | 0.399   |
| <b>ECOG PS</b>                              | <b>1-2 vs 0</b>       | 1.25 (0.82-1.89)                | 0.293   | 1.24 (0.81-1.90)                                    | 0.329   | 1.19 (0.78-1.83)                                    | 0.413   |
| <b>Side</b>                                 | <b>DX+TV vs SX</b>    | 0.93 (0.61-1.41)                | 0.730   | 0.90 (0.57-1.44)                                    | 0.675   | 0.87 (0.55-1.39)                                    | 0.559   |
| <b>Targeted Agent in first line therapy</b> | <b>Yes vs No</b>      | 0.86 (0.57-1.31)                | 0.498   | 0.80 (0.51-1.27)                                    | 0.354   | 0.83 (0.53-1.31)                                    | 0.434   |
| <b>Surgery for metastatic disease</b>       | <b>Yes vs No</b>      | 0.63 (0.40-1.01)                | 0.054   | 0.60 (0.37-0.97)                                    | 0.039   | 0.59 (0.36-0.95)                                    | 0.032   |
| <b>Number of metastatic sites</b>           | <b>2-3 vs 1</b>       | 1.75 (1.14-2.68)                | 0.010   | 1.84 (1.17-2.89)                                    | 0.009   | 1.91 (1.21-3.00)                                    | 0.005   |

**Supplementary Table 5:** Uni- and multivariate Cox regression models for overall survival (N=98). The multivariate Cox models were obtained by adjusting for all the variables tested in univariate analysis.

|                                       |                       | Univariate Cox regression model |         | Multivariate Cox regression model (ODS1 pos vs neg) |         | Multivariate Cox regression model (ODS2 pos vs neg) |         |
|---------------------------------------|-----------------------|---------------------------------|---------|-----------------------------------------------------|---------|-----------------------------------------------------|---------|
|                                       |                       | HR (95% CI)                     | p-value | HR (95% CI)                                         | p-value | HR (95% CI)                                         | p-value |
| <b>ODS1</b>                           | <b>Pos vs Neg</b>     | 2.21 (1.26-3.88)                | 0.006   | 1.96 (1.07-3.59)                                    | 0.030   |                                                     |         |
| <b>ODS2</b>                           | <b>Pos vs Neg</b>     | 2.34 (1.31-4.20)                | 0.004   |                                                     |         | 2.22 (1.18-4.16)                                    | 0.013   |
| <b>Gender</b>                         | <b>Female vs Male</b> | 0.79 (0.47-1.33)                | 0.369   | 0.63 (0.36-1.11)                                    | 0.109   | 0.61 (0.35-1.08)                                    | 0.091   |
| <b>Stage at diagnosis</b>             | <b>IV vs II-III</b>   | 1.24 (0.74-2.08)                | 0.412   | 1.23 (0.72-2.12)                                    | 0.445   | 1.20 (0.70-2.05)                                    | 0.515   |
| <b>ECOG PS</b>                        | <b>1-2 vs 0</b>       | 2.12 (1.28-3.52)                | 0.003   | 1.89 (1.10-3.25)                                    | 0.021   | 1.83 (1.06-3.14)                                    | 0.030   |
| <b>Side</b>                           | <b>DX+TV vs SX</b>    | 1.07 (0.66-1.76)                | 0.777   | 0.86 (0.50-1.49)                                    | 0.588   | 0.83 (0.48-1.42)                                    | 0.491   |
| <b>Second line therapy</b>            | <b>Yes vs No</b>      | 0.29 (0.17-0.48)                | <0.001  | 0.17 (0.09-0.32)                                    | <0.001  | 0.16 (0.09-0.31)                                    | <0.001  |
| <b>Surgery for metastatic disease</b> | <b>Yes vs No</b>      | 0.58 (0.34-0.99)                | 0.046   | 0.49 (0.28-0.88)                                    | 0.016   | 0.50 (0.28-0.90)                                    | 0.020   |
| <b>Number of metastatic sites</b>     | <b>2-3 vs 1</b>       | 1.40 (0.85-2.33)                | 0.188   | 1.83 (1.05-3.17)                                    | 0.031   | 1.85 (1.07-3.20)                                    | 0.028   |
| <b>Targeted Agents</b>                | <b>Yes vs No</b>      | 0.66 (0.40-1.07)                | 0.094   | 0.83 (0.48-1.43)                                    | 0.503   | 0.81 (0.47-1.40)                                    | 0.449   |
